25 **Abstract**

26

27 Effector and memory CD8<sup>+</sup> T cells accumulate in large numbers in the liver where they play  
28 key roles in the control of liver pathogens including *Plasmodium*. It has also been proposed  
29 that liver may act as the main place for elimination of effector CD8<sup>+</sup> T cells at the resolution  
30 of immune responses. Platelets and the integrin LFA-1 have been proposed to be critical for  
31 the accumulation of protective CD8<sup>+</sup> T cells in the liver; conversely, asialo-glycoprotein  
32 (ASGP) expression on the surface of CD8<sup>+</sup> T cells has been proposed to assist in elimination  
33 of effector T cells in the liver. Here we investigated the contributions of these interactions in  
34 the accumulation of CD8<sup>+</sup> T cells activated *in vitro* or *in vivo* by immunization with  
35 *Plasmodium* parasites. Using *Mpl*<sup>-/-</sup> mice with constitutive thrombocytopenia and antibody-  
36 mediated platelet depletion models we found that severe reduction in platelet concentration in  
37 circulation did not strongly influence the accumulation and protective function of CD8<sup>+</sup> T  
38 cells in the liver in these models. Surprisingly, inhibition of ASGP receptors did not inhibit  
39 the accumulation of effector cells in the liver, but instead prevented these cells from  
40 accumulating in the spleen. We further found that enforced expression of ASGP on effector  
41 CD8<sup>+</sup> T cells using ST3GalI knockout cells lead to their loss from the spleen. These data  
42 suggest that platelets play a marginal role in CD8<sup>+</sup> T cell function in the liver. Furthermore,  
43 ASGP-expressing effector CD8<sup>+</sup> T cells are retained in the liver but are lost from the spleen.

44

45

## 46 Introduction

47

48 Activated and memory but not naïve CD8<sup>+</sup> T cells accumulate in large numbers in the liver  
49 [1, 2]. These populations of CD8<sup>+</sup> T cells are capable of controlling infections by major liver  
50 pathogens including the malaria parasite *Plasmodium* and Hepatitis B virus (HBV) [3-5]. In  
51 particular, a population of tissue resident memory cells appears to mediate potent protection  
52 against disease [5-8]. CXCR6 expressing tissue-resident memory (TRM) cells patrol the  
53 hepatic sinusoids using primarily LFA-1-ICAM interactions to find and eliminate pathogens  
54 [7, 9]. The presence of these highly protective CD8<sup>+</sup> T cells sheds new light on an older  
55 body of literature that suggested that the liver was a “graveyard” for CD8<sup>+</sup> T cells [10]. In  
56 support of this hypothesis liver-primed CD8<sup>+</sup> T cells can be cleared by hepatocytes in a  
57 process of emperipolesis [11, 12]. It has further been suggested that this process may be  
58 mediated in part by interactions between surface asialo-glycoproteins (ASGPs) and their  
59 receptors which are highly expressed by hepatocytes [13-15]. As such the factors affecting  
60 the migration of CD8<sup>+</sup> T cells in the liver are incompletely understood as are those that  
61 predispose to retention vs. apoptosis in this organ.

62

63 In addition to LFA-1-ICAM1 interactions it has been proposed that retention of CD8<sup>+</sup> T cells  
64 in the liver is mediated by interactions with platelets [16]. Platelets are well known to  
65 encounter microbes and antigens *via* both innate and adaptive immune processes and help to  
66 shape subsequent adaptive responses [17, 18]. Platelets are implicated in the accumulation of  
67 neutrophils in the inflamed liver [19, 20]. In a mouse model of hepatitis, it was shown that  
68 depletion of platelets leads to enhanced disease due to the accumulation of CD8<sup>+</sup> T cells  
69 which are pathogenic in this situation [21]. Subsequent work has shown that platelets act as  
70 landing pads for CD8<sup>+</sup> T cells to dock on prior to establishing residence in the hepatic  
71 sinusoids [16]. In contrast, the role of platelets in the clearance of the malaria-causing  
72 *Plasmodium* parasite from the liver has not been studied. Protective CD8<sup>+</sup> T cells can be  
73 induced by vaccination with viral vectors or attenuated parasites [22, 23], but blood stage  
74 infection can ablate this vaccine-induced protection [24]. Importantly, fulminant blood stage  
75 infection induces thrombocytopenia in both humans and rodent models of malaria [25-27],  
76 thus if platelets were required for the formation and maintenance of resident CD8<sup>+</sup> T cell  
77 populations in the liver, an acute loss of platelets might be expected to ablate protective  
78 CD8<sup>+</sup> T cell responses.

79

80 Finally, an older body of literature suggests that interactions between ASGPs and their  
81 receptors which are abundantly expressed in the liver might mediate accumulation of  
82 activated CD8<sup>+</sup> T cells in this organ [13, 14]. CD8<sup>+</sup> T cells express high levels of ASGPs  
83 upon activation [28, 29], which is associated with apoptosis of activated lymphocytes and  
84 may be a mechanism of activated lymphocyte removal from the liver, providing a potential  
85 explanation for the “graveyard hypothesis” [15, 30]. However, these earlier experiments were  
86 performed with neuraminidase treated lymphocytes (a mix of cell types) rather than pure  
87 populations of activated CD8<sup>+</sup> T cells, so the specific role of ASGP receptors, and the liver  
88 more generally, in CD8<sup>+</sup> T cell retention and clearance in the liver has not been tested.  
89

90 To understand how protective memory responses arise in the liver we investigated the roles  
91 of platelets and ASGPs in the retention and removal, respectively, of CD8<sup>+</sup> T cells from the  
92 liver. Counter to findings in the HBV model [16], we found little role for platelets in the  
93 accumulation and effector function of CD8<sup>+</sup> T cells in the liver in our malaria model. We  
94 further found that though the formation of liver-resident memory was associated with the  
95 downregulation of ASGPs, interactions with ASGP receptors were not critical for  
96 accumulation of effector cells in the liver. These data suggest that LFA-1 is the critical factor  
97 for CD8<sup>+</sup> T cell accumulation in the liver, and that the spleen rather than the liver may be the  
98 main site of effector T cell apoptosis.  
99

## 100 **Materials and Methods**

101

### 102 *Mice*

103 C57BL/6.J mice, B6 CD45.1, OT-I mice [31], ITGAL-C77F (*Itgal<sup>-/-</sup>*) [7], uGFP [32] and  
104 Granzyme B cre mice [33] were bred in-house at the Australian National University (ANU).  
105 *Mpl<sup>-/-</sup>* [34] and *St3gall<sup>fl/fl</sup>* [35] mice were purchased from the Jackson Laboratory. Mice were  
106 maintained house under specific pathogen-free conditions except during infection  
107 experiments. Mice were aged matched between 6-8 weeks, and were sex matched for all  
108 experiments. All animal procedures were approved by the Animal Experimentation Ethics  
109 Committee of the Australian National University (Protocol numbers: A2016/17; 2019/36).  
110 All research involving animals was conducted in accordance with the National Health and  
111 Medical Research Council's Australian Code for the Care and Use of Animals for Scientific  
112 Purposes and the Australian Capital Territory Animal Welfare Act 1992.

113

### 114 *Immunisations, in-vivo platelet depletion and lectin blockade*

115 Mice were immunised intravenously (i.v) with  $5 \times 10^4$  *P. berghei* CS<sup>5M</sup> [36] sporozoites  
116 dissected by hand from the salivary glands of *Anopheles stephensi* mosquitos generated in-  
117 house within a quarantine approved facility. Prior to immunisation, sporozoites were  
118 irradiated at 200kRad of gamma radiation and delivered to each subject. Mice were  
119 monitored for the following 21 days for any sign of breakthrough infection both through  
120 behavioural changes and blood smear analysis. Platelet depletion of experimental mice was  
121 achieved using monoclonal antibodies at a concentration of 20µg per mouse in PBS and  
122 delivered i.v via the tail vein: anti-GPIbα (R300 polyclonal- Emfret), anti-αIIbβ3 (Leo.H4-  
123 Emfret). Platelet depletion occurred within 30 mins post-injection, however mice were  
124 monitored for 60 mins for adverse reactions or excessive bleeding. Control mice received  
125 20µg of an isotype control antibody diluted in PBS and delivered i.v via the tail vein. For  
126 lectin blockade, mice were treated with Asialofetuin or Fetuin (Sigma-Aldrich) i.v at  
127 concentrations ranging from 1mg/mouse to 3mg/mouse diluted in cold PBS and delivered  
128 prior to adoptive transfer studies.

129

### 130 *In vitro activation of T-lymphocytes*

131 Single cell suspensions of C57BL/6 splenocytes were obtained from euthanised animals and  
132 incubated with 1µg/ml of SIINFEKL ovalbumin peptide to stimulate T cells. The cells were  
133 then co-cultured with a single cell suspension of OT-1 splenocytes in T75 tissue culture flask

134 (ThermoFisher) for 2 days. On day 3, cells were subpassaged into fresh complete RPMI  
135 supplemented with 12.5U/ml of rhIL-2 (Peprotech) and incubated for a further 24 hours. The  
136 cells were subpassaged a final time with fresh media and IL-2 before being purified on a  
137 Histopaque® gradient and transferred.

138

#### 139 *Adoptive transfer of T-lymphocytes*

140 OT-I cells were purified on a Histopaque gradient post activation *in-vitro* or eluted from a  
141 CD8-negative selection MACS column (Miltenyi) from single cell suspensions of  
142 splenocytes. Once purified, the cells were stained (CellTrace™ Violet/ CellTrace™ CFSE)  
143 diluted and transferred i.v into sex matched C57BL/6 recipients unless otherwise indicated.  
144 For radiation-attenuated sporozoite (RAS) immunisation strategies,  $2 \times 10^4$  naïve cells were  
145 transferred 24 hours prior to RAS delivery. For intravital imaging and lymphocyte tracking  
146 experiments,  $5 \times 10^6$  cells were transferred to each mouse. For naïve and activated co-transfer  
147 experiments, approximately  $2.5 \times 10^6$  cells of each type were transferred. For protection  
148 assays,  $2 \times 10^6$  cells were transferred 4 hours prior to infection with *P.berghei*.

149

#### 150 *Lymphocyte harvesting and flow cytometry*

151 Single cell suspensions were isolated from euthanised mice and prepared using specified  
152 protocols to isolate cells from the liver, lung, spleen, lymph node and bone marrow.  
153 Single cell suspensions were incubated using Fc-Block (Biolegend) for 15 minutes on ice  
154 followed by staining with fluorescently conjugated Abs: anti-CD11a (clone M17/4-  
155 Biolegend), anti-KLRG1 (clone MAFA- Biolegend), anti-CD69 (clone H1.2F3- Biolegend),  
156 anti-CD8 (clone 5H10-1/clone 53.67- Biolegend), anti-Ly5a (clone A20- Biolegend), anti-  
157 Ly5b (clone 104- Biolegend), anti-CD62L (clone MEL14- Biolegend), anti-Vα2 (clone  
158 B20.1- Biolegend), anti-CD3 (clone 17.A2- Biolegend). Samples were then resuspended in  
159 FACs buffer with viability dye (7-AAD) and transferred to cluster tubes for cytometric  
160 analysis. If cells were to be fixed, processing omitted the 7-AAD step and incubated with a  
161 fixable live dead dye prior to incubation with fixation buffer (Biolegend) (15 mins). Cells  
162 were analyzed using a LSRII flow cytometer (Becton Dickinson) or Fortessa X20 cytometer  
163 (BD Biosciences). Data were analysed using FlowJo analysis software (Tree Star).

164

#### 165 *Platelet isolation and lymphocyte co-culture*

166 Blood was collected *via* tail vein bleed and collected in acid citrate dextrose solution (ACD).  
167 The blood was then stored at room temperature and centrifuged (250 g, 16 mins, 21°C). The

168 upper platelet-rich plasma (PRP) layer was removed and transferred to a new tube and rested  
169 for 15 minutes at room temperature. The PRP was then centrifuged (1200 g, 5 mins, 21°C)  
170 and the pellet was resuspended in platelet wash buffer (150mM NaCl containing 10mM  
171 trisodium citrate and 1% (w/v) dextrose, pH 7.4) and rested for 15 minutes. The suspension  
172 was centrifuged again (1200 g, 5 mins, 21°C) and gently resuspended in Tyrode's buffer to a  
173 concentration of  $2 \times 10^8$  platelets/ml before being rested at room temperature for 60 mins then  
174 50µl transferred to wells containing  $1 \times 10^6$  OT-I lymphocytes. Wells were cultured for 1 hour  
175 in a 10:1 ratio prior to being washed and stained with fluorochrome-conjugated Abs: anti-  
176 CD41 (clone MWRReg- Biolegend) and anti-CD8 (clone 53.67- Biolegend). Cultures were  
177 then analysed using Amnis ImageStream®X (Merck Millipore).

178

#### 179 *Assessment of parasite burden*

180 Parasite burden was measured via qRT-PCR using primers that recognise *P. berghei* specific  
181 sequences within the 18S rRNA and SYBR Green (Applied Biosystems) as outlined  
182 previously [37]. Parasite burdens were normalised with GAPDH expression.

183

#### 184 *Multiphoton microscopy*

185 Mice were prepared for microscopy *in vivo* as described previously (van de Ven *et al* 2013).  
186 Once the mouse was ready and applied to the movable platform of a Fluoview FVMPE-R  
187 multiphoton microscope, the platform was raised to ensure contact of the XLPLN25XWMP2  
188 objective lens with a drop of water on the coverslip (25x, NA1.05, water immersion; 2mm  
189 working distance). For the analysis of motility of cells activated *in vitro*, a 50µm Z-stack  
190 (2µm/slice) was typically acquired using the galvo-scanner at a frame rate of typically 2  
191 frames per minute. For naïve and activated motility analysis, a single slice was acquired using  
192 the resonant scanner with 3-6x averaging at a rate of approximately 3 frames/second. The  
193 images were acquired using the FV30 software (Olympus) and exported to Imaris (Bitplane)  
194 for track analysis using autoregressive motion algorithm and polarity analysis.

195

#### 196 *Statistical analysis*

197 Data is shown as individual data points with bars (where shown) indicating mean  $\pm$  S.D..  
198 Data from two or more experiments were analysed using linear mixed modelling (LMM) in R  
199 libraries *lm4* and *nlme* (The R Foundation for Statistical Computing). In the instance of data  
200 being pooled from several experiments, each experiment was included as a random effect

201 blocking factor in the LMM analysis. Cellular data was log transformed where data is  
202 presented on a log scale, prior to statistical analysis. For all other cellular data where  
203 experimental blocking factors did not need to be accounted for, analysis was conducted in  
204 GraphPad Prism v7.



205 **Results**

206

207 *Activated but not naïve CD8<sup>+</sup> T cells accumulate and patrol in the liver sinusoids*

208

209 To determine the different homing and migration patterns of activated and naïve CD8<sup>+</sup> T  
210 cells we co-transferred differentially labelled *in vitro* activated and naïve OT-I T cells  
211 specific for the SIINFEKL epitope from chicken ovalbumin to naïve mice (Figure 1A).

212 Preliminary studies showed that, similar to *in vivo* activated cells, *in vitro* activated cells had  
213 elevated levels of LFA-1 and could be labelled with Peanut Agglutinin (PNA) which binds  
214 ASGPs and to a lesser extent asialo-gangliosides such as asialo ganglio-N-tetraosylceramide  
215 (asialo GM) [38] (Figure S1 A and B). We also determined that effector cells were able to  
216 bind platelets at a ~10-fold higher frequency than naïve cells as revealed by CD41/CD8 co-  
217 staining (Figure S1C). Finally, Imageflow analysis revealed that activated cells typically  
218 bound multiple platelets while the few naïve cells that bound platelets only bound a single  
219 platelet (Figure S1D).

220

221 Twenty-four hours after the co-transfer of GFP<sup>+</sup> naïve and cell trace violet (CTV)-labelled  
222 activated OT-I cells, total lymphocytes were recovered from the liver, lung, bone marrow,  
223 spleen and lymph nodes and analysed by flow cytometry. Naïve and activated cells  
224 accumulated roughly evenly in the spleen while naïve cells specifically accumulated in the  
225 lymph node (Figure 1B); conversely activated CD8<sup>+</sup> T cells preferentially accumulated in the  
226 liver and lung, and to a lesser extent in the bone marrow (Figure 1C). We further examined  
227 the behaviour of the co-transferred naïve cells and activated cells within in the liver by multi-  
228 photon microscopy. In these studies, we used a resonance scanner to take high frame rate  
229 movies enabling us to capture both crawling cells and faster flowing cells in the blood stream  
230 (Movie S1; Figure 1D). In agreement with our previous analysis [7], activated CD8<sup>+</sup> T cells  
231 undertook a crawling behaviour in the liver sinusoids in which they become elongated and  
232 move both with and against the blood flow at average speed of <25µm/min (Figure 1D-E),  
233 while naïve cells were generally observed to be either flowing in the blood or rounded up and  
234 stationary (Figure 1E-F), a phenotype which we have previously associated with activated  
235 *Itgal*<sup>-/-</sup> OT-I cells that lack expression of the LFA-1 integrin [7].

236

237 *Platelets are not required for CD8<sup>+</sup> T cell effector function in the Plasmodium infected liver*

238

239 To test the role of platelets in CD8<sup>+</sup> T cell effector function in the liver we used *Mpl*<sup>-/-</sup> mice,  
240 which carry a mutation in the thrombopoietin receptor (*Mpl*) gene and have around 15% of the  
241 normal number of circulating platelets [34]. We transferred *in vitro* activated OT-I cells to  
242 wild-type and platelet deficient *Mpl*<sup>-/-</sup> mice that were subsequently infected with *P. berghei*  
243 CS<sup>5M</sup> parasites. *P. berghei* CS<sup>5M</sup> parasite express the SIINFEKL epitope recognized by OT-I  
244 cells within the surface circumsporozoite protein [36]. Parasite burden was subsequently  
245 measured by RT-PCR [37]. In both WT and *Mpl*<sup>-/-</sup> mice, activated OT-I T cells conferred  
246 significant protection against infection, however the degree of protection was significantly  
247 lower in *Mpl*<sup>-/-</sup> mice suggesting that platelets may play a role in protection (Figure 2A).  
248 However *Mpl*<sup>-/-</sup> mice have elevated levels of circulating thrombopoietin which may alter  
249 haematopoiesis in these mice potentially affecting the protective capacity indirectly [39]. To  
250 specifically investigate the role of platelets, we also measured the ability of activated CD8<sup>+</sup> T  
251 cells to protect mice that had undergone platelet depletion using an anti- $\alpha$ IIb $\beta$ 3 mAb, which  
252 targets integrin  $\alpha$ IIb $\beta$ 3 expressed only on the platelet membrane, and, in our hand, results in  
253 >97% reduction in the numbers of circulating platelets 2 hour post injection [40]. In this  
254 system CD8<sup>+</sup> T cells transferred to platelet-depleted mice were able to protect against  
255 malaria challenge equally well as cells transferred to platelet replete/sufficient/intact mice  
256 (Figure 2B).

257

258 CD8<sup>+</sup> T cell killing is preceded by the formation of clusters of activated CD8<sup>+</sup> T cells around  
259 the infected hepatocyte [41-43]. We therefore examined the kinetics of cluster formation 2, 4  
260 and 8 hours after transfer of CD8<sup>+</sup> T cells to infected *Mpl*<sup>-/-</sup> and WT mice. However, no  
261 difference in the size of clusters formed around infected hepatocytes in *Mpl*<sup>-/-</sup> mice compared  
262 to wild-type controls was detectable by quantitative microscopy suggesting that platelets are  
263 not required for the localization of *Plasmodium*-infected hepatocytes by CD8<sup>+</sup> T cells  
264 (Figure 2C-D). Overall, these data suggest that platelets play limited roles in CD8<sup>+</sup> T cell  
265 accumulation within the liver and in the control of infection once cells are established in the  
266 liver.

267

268 *Platelets are not required for normal CD8<sup>+</sup> T cell motility and accumulation in the liver*

269

270 Earlier studies describing a role for platelets in the homing of CD8<sup>+</sup> T cells in the liver  
271 suggested that platelets were required for the initial tethering of activated CD8<sup>+</sup> T cells to the

272 walls of the hepatic sinusoids [16]. We hypothesised, therefore, that platelets may be acting  
273 earlier than the timepoints examined in the above experiments. Activated CD8<sup>+</sup> T cells were  
274 therefore transferred to *Mpl*<sup>-/-</sup> and control mice and CD8<sup>+</sup> T cell accumulation was measured  
275 in the liver and spleen (Figure 3A). We further considered that the tethering effect of platelets  
276 might be partially redundant with LFA-1 binding by CD8<sup>+</sup> T cells in the liver. We therefore  
277 also activated *Itgal*<sup>-/-</sup> OT-I cells and co-transferred these with activated wild-type OT-I cells.  
278 Surprisingly, after 20 mins *Itgal*<sup>-/-</sup> cells were observed to accumulate in greater numbers  
279 within the liver than wild-type cells (Figure 3B-C), however, they were then rapidly lost from  
280 this organ and subsequently accumulated in the spleen (Figure 3D-E). Despite clear  
281 differences in the accumulation of *Itgal*<sup>-/-</sup> versus wildtype cells, the kinetics of accumulation  
282 of both *Itgal*<sup>-/-</sup> and wild-type OT-I cells as suggested by linear mixed effect modelling was  
283 similar between wild-type and *Mpl*<sup>-/-</sup> hosts regardless of which organ was studied (Figure 3B-  
284 E). Overall, we were unable to discern any defect in CD8<sup>+</sup> T cell accumulation in the livers  
285 of *Mpl*<sup>-/-</sup> mice, although we were able to confirm a role for LFA-1 in this process.

286

287 To determine if there were any differences in the behaviour of cells once retained in the liver,  
288 activated CD8<sup>+</sup> T cells were transferred to wild-type or *Mpl*<sup>-/-</sup> mice and the patterns of  
289 migration in the sinusoids 4 or 24 hours after transfer was measured using multiphoton  
290 microscopy. Using this analysis, we were unable to discern any difference in speed,  
291 straightness or time spent moving between CD8<sup>+</sup> cells in the livers of *Mpl*<sup>-/-</sup> or control  
292 animals (Movie S2; Figure S2A-B).

293

294 As *Mpl*<sup>-/-</sup> mice have sufficient residual platelets (~15% of the normal number) to confer  
295 nearly normal haemostatic function, we examined the accumulation of wild-type and *Itgal*<sup>-/-</sup>  
296 deficient CD8<sup>+</sup> T cells in anti-GPIb $\alpha$  antibody treated mice, which depletes platelets to <5%  
297 of normal levels (Figure 4A-B). This same antibody was used in previous studies examining  
298 hepatitis B virus-specific CD8<sup>+</sup> T cells [16]. Importantly, anti-GPIb $\alpha$  antibodies deplete  
299 platelets by inducing the expression of neuraminidase on platelets leading to the exposure of  
300 asialo-glycoproteins on the surface of platelets and their clearance by ASGP receptors on  
301 hepatocytes [44]. Similar to our results with *Mpl*<sup>-/-</sup> animals, activated wild-type OT-I T cells  
302 accumulated at similar levels in the livers of anti-GPIb $\alpha$  antibody-treated mice and control  
303 animals (Figure 4C-D). However, the accumulation of *Itgal*<sup>-/-</sup> cells in the liver, which was  
304 already limited, was further impaired by platelet depletion. Thus, under these conditions we

305 were able to identify a modest role for platelets in the accumulation of activated *Itgal*<sup>-/-</sup> cells,  
306 although the effect of LFA-1 deficiency was much greater (Figure S3B and C). Interestingly,  
307 both wild-type and *Itgal*<sup>-/-</sup> OT-I cells were inhibited in their ability to accumulate within the  
308 spleen in the anti-GPIb $\alpha$  antibody treated mice (Figure 4C-D). This contrasted with the lack  
309 of phenotype observed in the platelet-deficient *Mpl*<sup>-/-</sup> mice. This difference could be due to an  
310 insufficient loss of platelets in the *Mpl*<sup>-/-</sup> mice, or an off-target effect of the depleting  
311 antibodies.

312

313 *Platelet deficiency does not affect the formation of liver resident memory cell populations*

314

315 The previous experiments were performed with *in vitro* activated cells which may not fully  
316 replicate all aspects of infection or immunization situations. We therefore asked whether  
317 platelets may play a role in the formation of T cell populations in the spleen and liver after *in*  
318 *vivo* immunization. In particular, since we have previously identified roles for LFA-1 and  
319 CXCR6 in the formation of liver tissue resident memory T cells (TRM) we wished to  
320 examine this population [7, 9]. Accordingly, we assessed the ability of *P. berghei* CS<sup>5M</sup>  
321 sporozoite primed mice to form CD8<sup>+</sup> TRM in the livers of *Mpl*<sup>-/-</sup> mice or platelet-depleted  
322 mice that had received OT-I cells (Figure 5A; Figure S3A). However, CD8<sup>+</sup> T cell  
323 populations appeared normal in terms of numbers and phenotypes in *Mpl*<sup>-/-</sup> mice compared to  
324 wild-type mice suggesting that low platelets do not affect the accumulation or maintenance of  
325 TRM populations in the liver (Figure 5B-C). In further support of this, administration of the  
326 anti-GPIb $\alpha$  antibody 24hr before tissue harvesting also had no effect on the numbers of  
327 CD8<sup>+</sup> TRM cells in the livers of sporozoite immunized mice (Figure S3B-C).

328

329 *Asialylated glycoproteins (ASGPs) mediate effector CD8<sup>+</sup> T cell accumulation in the red*  
330 *pulp of the spleen*

331

332 In addition to platelets, ASGPs have been proposed to mediate the accumulation of  
333 lymphocytes in the liver. This accumulation is hypothesised to precede the destruction of  
334 cells either via apoptosis or via the uptake of cells by hepatocytes also known as  
335 emperiopolesis [11, 12, 15, 45]. To investigate the role of ASGPs in the accumulation of  
336 activated CD8<sup>+</sup> T cells in the liver, *in vitro* activated effector cells were transferred to mice  
337 that had received asialo-fetuin (ASF) to block ASGP receptors. Control mice received fetuin

338 which is abundantly glycosylated with sialylated carbohydrates (Figure 6A). Strikingly, ASF  
339 did not alter effector T cell accumulation in the liver, but similar to anti-GPIb $\alpha$  treatment,  
340 blocked accumulation in the spleen (Figure 6B-C). Because anti-GPIb $\alpha$  treatment results in  
341 the release of neuraminidase which desialylates glycoproteins we speculated that this  
342 treatment may also be impacting upon effector T cell accumulation in the spleen via blockage  
343 of ASGPs. We therefore repeated the ASF blockade experiment including additional groups  
344 treated with anti-GPIb $\alpha$  antibodies. However, platelet depletion did not further enhance the  
345 exclusion of cells from the spleen via ASF (Figure 6B-C). These data suggest that anti-GPIb $\alpha$   
346 antibody treatment was not inhibiting CD8<sup>+</sup> T cell accumulation in the spleen as a result of  
347 platelet depletion but rather by ablating of ASGP receptor (ASGPR) function.

348

349 To further dissect the effect of ASF on effector cell homing to the spleen we examined the  
350 specific locations in the spleen in which effector T cells accumulated and determined whether  
351 ASF treatment specifically affected migration to particular sub-compartments. Accordingly,  
352 we designed an experiment in which naïve CD45.1 OT-I cells and activated OT-I cells were  
353 transferred to mice in the presence of ASF or fetuin. Three minutes prior to euthanasia the  
354 mice were injected i.v with anti-CD8a antibody (Figure 6D) which labels the cells in the red  
355 pulp that are exposed to the circulation, but not those in the white pulp that are shielded from  
356 the circulation. As expected, the naïve cells preferentially accumulated in the white pulp and  
357 this migration was not affected by ASF treatment (Figure 6E-F), which is consistent with the  
358 lack of ASGPs on the surface of naïve CD8<sup>+</sup> T cells (Figure S1). However, activated cells  
359 accumulated equally between the red and white pulp in the control mice, but were  
360 specifically excluded from the red pulp in the ASF treated animals (Figure 6E-F). Thus,  
361 interactions with ASGPs appear to mediate the accumulation of effector T cells in the red  
362 pulp of the spleen.

363

364 *Forced expression of ASGPs drives the loss of effector T cells from the spleen but not the*  
365 *liver*

366

367 To extend the finding *in vitro* that ASGP expression mediated the accumulation of activated  
368 effector T cells in the spleen to an *in vivo* immunization model, we transferred OT-I cells to  
369 mice which were then immunized with *P. berghei* CS<sup>5M</sup> sporozoites. The expression of  
370 ASGPs on activated CD8<sup>+</sup> T cells was measured using PNA staining on days 7, 14 and 28

371 post immunization. As expected, large numbers of cells accumulated in the spleen and liver  
372 (Figure S4A) and populations of effector (Teff; KLRG1<sup>hi</sup>, CD62L<sup>lo</sup>), effector memory (TEM;  
373 CD62L<sup>lo</sup>, CD69<sup>-</sup>, KLRG1<sup>lo</sup>) and central memory cells (TCM; CD62L<sup>hi</sup>, KLRG1<sup>lo</sup>) could be  
374 identified in both organs, while the liver also carried substantial numbers of CD69<sup>hi</sup> CD62L<sup>lo</sup>  
375 KLRG1<sup>lo</sup> liver TRM cells (Figure S4B-C). In contrast PNA binding was highest on Teff  
376 cells at early time points declining with time (Figure S4D-E). PNA binding was also highest  
377 initially in the liver but declined to similar levels in the spleen and liver by day 28 (Figure  
378 S4D-E). Interestingly TRM cells in the liver had significantly lower PNA binding than other  
379 populations suggesting that the establishment of this memory population may be dependent  
380 on the loss of ASGP receptors (Figure S4D-E).

381

382 To investigate the effects of ASGP expression on CD8<sup>+</sup> T cell fate we created a situation in  
383 which ASGP expression was enforced on responding CD8<sup>+</sup> T cells. Sialylation of Core1  
384 glycoproteins is mediated by the enzyme ST3 beta-galactoside alpha-2,3-sialyltransferase 1  
385 (ST3Gal1; Figure 7A). We therefore crossed our OT-I mice to *St3gal1*<sup>fl/fl</sup> x Granzyme B Cre  
386 (GzbcCre) animals such that ST3Gal1 was deficient in all responding CD8<sup>+</sup> T cells and PNA-  
387 binding was enforced uniformly (Figure 7B). We used a granzyme B Cre as previous studies  
388 with a CD4 Cre showed that enforced expression of PNA in the thymus led to apoptosis and  
389 the loss of peripheral CD8<sup>+</sup> T cells [35]. In these experiments *St3gal1*<sup>fl/fl</sup> x GzbcCre (Het) or  
390 KO *St3gal1*<sup>fl/fl</sup> x GzbcCre (KO) Ly5B OT-I cells were co-transferred to wild-type (Ly5A) mice  
391 with Ly5AB OT-I wild-type cells prior to immunization with *P. berghei* CS<sup>5M</sup> parasites and  
392 analysis at effector (day 7) and memory (day 28) timepoints (Figure 7C). This protocol was  
393 designed to enable us to control for any unrelated differences between Ly5A and Ly5B mice.

394

395 At day 7, both the Het and KO cells had a small survival disadvantage compared to control  
396 cells in both the spleen and liver, however the difference was not significant between these  
397 groups (Figure 6D-E). By day 28 however, the KO cells with enforced expression of ASGPs  
398 were lost from the spleen but not the liver (Figure 7D-E), consistent with our data using *in*  
399 *vitro* effector T cells, showing that ASGP expression is critical for interactions with the  
400 spleen but not the liver. Notably this overall loss of KO OT-I cells was driven by a loss of  
401 Teff cells in the spleen, but not other populations which was apparent in the spleen (Figure  
402 7F-G) but not the liver (Figure 7H-I). Collectively these data suggest that high expression of  
403 ASGPs on Teff cells leads to accumulation in the liver, but also ultimate removal from the

404 circulation by the spleen. In contrast TRMs are likely to downregulate these receptors to  
405 facilitate their maintenance in the liver.



## 406 Discussion

407

408 Unlike lymphocytes in high endothelial venules, effector CD8<sup>+</sup> T cell homing to the liver  
409 does not undergo selectin mediated rolling [46, 47], rather these cells crawl through the  
410 sinusoids, searching for antigen using an LFA-1-dependent patrolling behaviour [6, 7, 16]. It  
411 has been proposed in a model of HBV infection that, instead of rolling, CD8<sup>+</sup> T cells in the  
412 liver initially tether to the endothelium via platelets [16]. We investigated this process in the  
413 context of *Plasmodium* infection and immunization. Using both thrombocytopenic (*Mpl*<sup>-/-</sup>)  
414 mice and platelet-depleted recipient animals, we found that the large reduction in platelet  
415 concentration in circulation had at best minor effect on the effector function or accumulation  
416 of CD8 T-cells in the liver during *Plasmodium* infection. Platelet deficiency also did not  
417 affect the generation of liver TRMs in mice immunized with *Plasmodium* sporozoites.  
418 Finally, we found that ASGP expression on the surface of activated CD8<sup>+</sup> T cells did not  
419 mediate the accumulation of CD8<sup>+</sup> T cells in the liver. Rather, ASGPs mediate effector CD8  
420 T-cell accumulation in the red pulp of the spleen, where we hypothesize these cells are  
421 removed from the lymphocyte pool. Our results, thus, differ from the findings that platelets  
422 play important roles in CD8 T-cell homing in HBV model [16, 21].

423

424 Platelets have also been observed to play an important role in the accumulation of neutrophils  
425 cells in the liver in conditions of sterile injury [48]. We were able to observe some deficiency  
426 in CD8<sup>+</sup> T cell-mediated killing in *Mpl*<sup>-/-</sup> mice, however, this was unlikely to be due to  
427 thrombocytopenia as we were unable to see a similar effect in platelet-depleted animals. One  
428 limitation is that we do not know if our antibody depletion methods remove platelets that are  
429 already bound to activated CD8<sup>+</sup> T cells. LFA-1 deficient (*Itgal*<sup>-/-</sup>) cells also showed a  
430 modest reduction of lymphocyte homing to the liver in platelet-deficient recipients.  
431 Collectively, these data suggest that LFA-1 is the dominant adhesion molecule involved in  
432 the retention of CD8<sup>+</sup> T cells in the liver in our immunization models. One critical  
433 difference between our models and those used previously is the burden of antigen and  
434 inflammation in the liver: viral infection models induce a high burden of inflammation within  
435 the endothelial cells and parenchyma of the liver [16, 21], whereas the density of parasites in  
436 the *Plasmodium*-infected liver is low [49]. Roles for platelets in neutrophil accumulation in  
437 the liver have also been observed exclusively in conditions of inflammation [20, 48, 50].

438



439 One limitation of our studies is that all models of platelet deficiency have possible artifactual  
440 effects. *Mpl*<sup>-/-</sup> mice have defects in haematopoiesis and retain around 15% of normal platelet  
441 numbers which may be sufficient for many functions [34, 39]. For example *Mpl*<sup>-/-</sup> do not  
442 suffer from obvious bleeding problems [34]. Platelet depletion studies with antibodies can  
443 demonstrate systemic dysregulation of inflammatory processes, including changes to  
444 lymphocyte homing to the liver and spleen; notably, the use of anti-GPIb $\alpha$  antibodies results  
445 in the release of neuraminidase which may alter the sialylation of circulating and cell-  
446 associated proteins [44]. We hypothesise that this may in turn alter the homing of  
447 lymphocytes via the blockade of ASGPRs. This hypothesis would explain the apparent  
448 inhibition of effector CD8<sup>+</sup> T cell homing to the spleen in antibody-mediated platelet-  
449 depletion models but not in *Mpl*<sup>-/-</sup> mice.

450

451 ASGP exposure of the cell surface makes CD8<sup>+</sup> T-cells vulnerable to apoptosis in the  
452 absence of antigen [15, 35]. The effects of desialylation on lymphocyte homing has been  
453 demonstrated with neuraminidase treated naïve cells, however these studies failed to  
454 investigate the role of ASGP expression during lymphocyte activation [13, 14]. The resultant  
455 enhanced binding to the liver was thought to be mediated by interactions with ASGPs and the  
456 ASGPR also known as the Ashwell-Morrell receptor [14, 51]. The ASGPR is abundantly  
457 expressed in the liver so the finding that ASGPs mediate accumulation in the spleen was  
458 surprising. It may be that cells accumulate in the spleen via interaction with a different  
459 receptor, one candidate would be Clec10a, which is abundantly expressed on macrophages  
460 and has been implicated in the clearance of desialylated platelets by Kupffer cells [52].  
461 Importantly, our data suggest that the down regulation of ASGP expression on the cell  
462 surface may be required for the persistence of TCM and TRM in the spleen and liver,  
463 respectively.

464

465 Our study further supports the finding that LFA-1<sup>hi</sup> CD8<sup>+</sup> T cells in the liver represent a  
466 functional population capable of protecting against infection [6]. The formation of these  
467 protective populations in conditions of little or no inflammation does not require large  
468 numbers of platelets. Our data also suggests that it is the red pulp of the spleen, not the liver  
469 that is the true graveyard of senescent effector T cells. These data support an emerging  
470 paradigm that CD8<sup>+</sup> T cells in the liver are a plastic population that not only protect against  
471 liver infection but also trans-differentiate into TRM populations in other tissues in the event  
472 of infection in other sites of the body [53].

473 **Acknowledgements**

474

475 We thank M. Devoy, H. Vohra, and C. Gillespie of the Imaging and Cytometry Facility at the  
476 John Curtin School of Medical Research for assistance with flow cytometry and multiphoton  
477 microscopy.

478 **References**

479

- 480 1. Mehal, W.Z., A.E. Juedes, and I.N. Crispe, *Selective retention of activated CD8+ T*  
481 *cells by the normal liver*. J Immunol, 1999. **163**(6): p. 3202-10.
- 482 2. John, B. and I.N. Crispe, *Passive and active mechanisms trap activated CD8+ T cells*  
483 *in the liver*. J Immunol, 2004. **172**(9): p. 5222-9.
- 484 3. Schofield, L., et al., *Gamma interferon, CD8+ T cells and antibodies required for*  
485 *immunity to malaria sporozoites*. Nature, 1987. **330**(6149): p. 664-6.
- 486 4. Weiss, W.R., et al., *CD8+ T cells (cytotoxic/suppressors) are required for protection*  
487 *in mice immunized with malaria sporozoites*. Proc Natl Acad Sci U S A, 1988. **85**(2):  
488 p. 573-6.
- 489 5. Pallett, L.J., et al., *IL-2(high) tissue-resident T cells in the human liver: Sentinels for*  
490 *hepatotropic infection*. J Exp Med, 2017. **214**(6): p. 1567-1580.
- 491 6. Fernandez-Ruiz, D., et al., *Liver-Resident Memory CD8(+) T Cells Form a Front-*  
492 *Line Defense against Malaria Liver-Stage Infection*. Immunity, 2016. **45**(4): p. 889-  
493 902.
- 494 7. McNamara, H.A., et al., *Up-regulation of LFA-1 allows liver-resident memory T cells*  
495 *to patrol and remain in the hepatic sinusoids*. Sci Immunol, 2017. **2**(9).
- 496 8. Valencia-Hernandez, A.M., et al., *A Natural Peptide Antigen within the Plasmodium*  
497 *Ribosomal Protein RPL6 Confers Liver TRM Cell-Mediated Immunity against*  
498 *Malaria in Mice*. Cell Host Microbe, 2020. **27**(6): p. 950-962 e7.
- 499 9. Tse, S.W., et al., *The chemokine receptor CXCR6 is required for the maintenance of*  
500 *liver memory CD8(+) T cells specific for infectious pathogens*. J Infect Dis, 2014.  
501 **210**(9): p. 1508-16.
- 502 10. Park, S., et al., *Biology and significance of T-cell apoptosis in the liver*. Immunol Cell  
503 Biol, 2002. **80**(1): p. 74-83.
- 504 11. Benseler, V., et al., *Hepatocyte entry leads to degradation of autoreactive CD8 T*  
505 *cells*. Proc Natl Acad Sci U S A, 2011. **108**(40): p. 16735-40.
- 506 12. Siervo, F., et al., *Suicidal emperipolesis: a process leading to cell-in-cell structures, T*  
507 *cell clearance and immune homeostasis*. Curr Mol Med, 2015. **15**(9): p. 819-27.
- 508 13. Woodruff, J.J. and B.M. Gesner, *The effect of neuraminidase on the fate of transfused*  
509 *lymphocytes*. J Exp Med, 1969. **129**(3): p. 551-67.
- 510 14. Samlowski, W.E., G.J. Spangrude, and R.A. Daynes, *Studies on the liver*  
511 *sequestration of lymphocytes bearing membrane-associated galactose-terminal*  
512 *glycoconjugates: reversal with agents that effectively compete for the*  
513 *asialoglycoprotein receptor*. Cell Immunol, 1984. **88**(2): p. 309-22.
- 514 15. Guy, C.S., S.L. Rankin, and T.I. Michalak, *Hepatocyte cytotoxicity is facilitated by*  
515 *asialoglycoprotein receptor*. Hepatology, 2011. **54**(3): p. 1043-50.
- 516 16. Guidotti, L.G., et al., *Immunosurveillance of the liver by intravascular effector*  
517 *CD8(+) T cells*. Cell, 2015. **161**(3): p. 486-500.
- 518 17. Hottz, E.D., F.A. Bozza, and P.T. Bozza, *Platelets in Immune Response to Virus and*  
519 *Immunopathology of Viral Infections*. Front Med (Lausanne), 2018. **5**: p. 121.
- 520 18. Marcoux, G., et al., *Role of platelets and megakaryocytes in adaptive immunity*.  
521 Platelets, 2021. **32**(3): p. 340-351.
- 522 19. Lalor, P.F., et al., *Hepatic sinusoidal endothelium avidly binds platelets in an*  
523 *integrin-dependent manner, leading to platelet and endothelial activation and*  
524 *leukocyte recruitment*. Am J Physiol Gastrointest Liver Physiol, 2013. **304**(5): p.  
525 G469-78.

- 526 20. McNamara, H.A. and I.A. Cockburn, *The three Rs: Recruitment, Retention and*  
527 *Residence of leukocytes in the liver*. Clin Transl Immunology, 2016. **5**(12): p. e123.
- 528 21. Iannacone, M., et al., *Platelets mediate cytotoxic T lymphocyte-induced liver damage*.  
529 Nat Med, 2005. **11**(11): p. 1167-9.
- 530 22. Nussenzweig, R.S., et al., *Protective immunity produced by the injection of x-*  
531 *irradiated sporozoites of plasmodium berghei*. Nature, 1967. **216**(5111): p. 160-2.
- 532 23. Li, S., et al., *Priming with recombinant influenza virus followed by administration of*  
533 *recombinant vaccinia virus induces CD8+ T-cell-mediated protective immunity*  
534 *against malaria*. Proc Natl Acad Sci U S A, 1993. **90**(11): p. 5214-8.
- 535 24. Ocana-Morgner, C., M.M. Mota, and A. Rodriguez, *Malaria blood stage suppression*  
536 *of liver stage immunity by dendritic cells*. J Exp Med, 2003. **197**(2): p. 143-51.
- 537 25. DeGraves, F.J. and H.W. Cox, *Interrelationships of immunoglobulin, immune*  
538 *complexes, and complement in anemia, thrombocytopenia, and parasitemia of acute*  
539 *and chronic malaria in rats*. J Parasitol, 1983. **69**(2): p. 262-6.
- 540 26. Adedapo, A.D., et al., *Age as a risk factor for thrombocytopenia and anaemia in*  
541 *children treated for acute uncomplicated falciparum malaria*. J Vector Borne Dis,  
542 2007. **44**(4): p. 266-71.
- 543 27. Jeremiah, Z.A. and E.K. Uko, *Depression of platelet counts in apparently healthy*  
544 *children with asymptomatic malaria infection in a Nigerian metropolitan city*.  
545 Platelets, 2007. **18**(6): p. 469-71.
- 546 28. Galvan, M., et al., *Alterations in cell surface carbohydrates on T cells from virally*  
547 *infected mice can distinguish effector/memory CD8+ T cells from naive cells*. J  
548 Immunol, 1998. **161**(2): p. 641-8.
- 549 29. Onami, T.M., et al., *Dynamic regulation of T cell immunity by CD43*. J Immunol,  
550 2002. **168**(12): p. 6022-31.
- 551 30. Meesmann, H.M., et al., *Decrease of sialic acid residues as an eat-me signal on the*  
552 *surface of apoptotic lymphocytes*. J Cell Sci, 2010. **123**(Pt 19): p. 3347-56.
- 553 31. Hogquist, K.A., et al., *T cell receptor antagonist peptides induce positive selection*.  
554 Cell, 1994. **76**(1): p. 17-27.
- 555 32. Schaefer, B.C., et al., *Observation of antigen-dependent CD8+ T-cell/ dendritic cell*  
556 *interactions in vivo*. Cell Immunol, 2001. **214**(2): p. 110-22.
- 557 33. Jacob, J. and D. Baltimore, *Modelling T-cell memory by genetic marking of memory T*  
558 *cells in vivo*. Nature, 1999. **399**(6736): p. 593-7.
- 559 34. Gurney, A.L., et al., *Thrombocytopenia in c-mpl-deficient mice*. Science, 1994.  
560 **265**(5177): p. 1445-7.
- 561 35. Priatel, J.J., et al., *The ST3Gal-I sialyltransferase controls CD8+ T lymphocyte*  
562 *homeostasis by modulating O-glycan biosynthesis*. Immunity, 2000. **12**(3): p. 273-83.
- 563 36. Cockburn, I.A., et al., *Dendritic cells and hepatocytes use distinct pathways to*  
564 *process protective antigen from plasmodium in vivo*. PLoS Pathog, 2011. **7**(3): p.  
565 e1001318.
- 566 37. Bruna-Romero, O., et al., *Detection of malaria liver-stages in mice infected through*  
567 *the bite of a single Anopheles mosquito using a highly sensitive real-time PCR*. Int J  
568 Parasitol, 2001. **31**(13): p. 1499-502.
- 569 38. Sung, C.C., et al., *Asialo GM1-positive liver-resident CD8 T cells that express CD44*  
570 *and LFA-1 are essential for immune clearance of hepatitis B virus*. Cell Mol  
571 Immunol, 2021. **18**(7): p. 1772-1782.
- 572 39. Solar, G.P., et al., *Role of c-mpl in early hematopoiesis*. Blood, 1998. **92**(1): p. 4-10.
- 573 40. Yoon, J., et al., *Potential contrasting effects of platelets on the migration and invasion*  
574 *of sarcomas versus carcinomas*. Platelets, 2021. **32**(5): p. 662-670.

- 575 41. Cockburn, I.A., et al., *In vivo imaging of CD8+ T cell-mediated elimination of*  
576 *malaria liver stages*. Proc Natl Acad Sci U S A, 2013. **110**(22): p. 9090-5.
- 577 42. Kimura, K., et al., *CD8+ T cells specific for a malaria cytoplasmic antigen form*  
578 *clusters around infected hepatocytes and are protective at the liver stage of infection*.  
579 Infect Immun, 2013. **81**(10): p. 3825-34.
- 580 43. Akbari, M., et al., *Nonspecific CD8(+) T Cells and Dendritic Cells/Macrophages*  
581 *Participate in Formation of CD8(+) T Cell-Mediated Clusters against Malaria Liver-*  
582 *Stage Infection*. Infect Immun, 2018. **86**(4).
- 583 44. Li, J., et al., *Desialylation is a mechanism of Fc-independent platelet clearance and a*  
584 *therapeutic target in immune thrombocytopenia*. Nat Commun, 2015. **6**: p. 7737.
- 585 45. Holz, L.E., et al., *Intrahepatic murine CD8 T-cell activation associates with a distinct*  
586 *phenotype leading to Bim-dependent death*. Gastroenterology, 2008. **135**(3): p. 989-  
587 97.
- 588 46. Jaeschke, H. and C.W. Smith, *Cell adhesion and migration. III. Leukocyte adhesion*  
589 *and transmigration in the liver vasculature*. Am J Physiol, 1997. **273**(6): p. G1169-  
590 73.
- 591 47. Wong, J., et al., *A minimal role for selectins in the recruitment of leukocytes into the*  
592 *inflamed liver microvasculature*. J Clin Invest, 1997. **99**(11): p. 2782-90.
- 593 48. Slaba, I., et al., *Imaging the dynamic platelet-neutrophil response in sterile liver*  
594 *injury and repair in mice*. Hepatology, 2015. **62**(5): p. 1593-605.
- 595 49. Cockburn, I.A., S.W. Tse, and F. Zavala, *CD8+ T cells eliminate liver-stage*  
596 *Plasmodium berghei parasites without detectable bystander effect*. Infect Immun,  
597 2014. **82**(4): p. 1460-4.
- 598 50. Malehmir, M., et al., *Platelet GPIbalpha is a mediator and potential interventional*  
599 *target for NASH and subsequent liver cancer*. Nat Med, 2019. **25**(4): p. 641-655.
- 600 51. Grewal, P.K., *The Ashwell-Morell receptor*. Methods Enzymol, 2010. **479**: p. 223-41.
- 601 52. Deppermann, C., et al., *Macrophage galactose lectin is critical for Kupffer cells to*  
602 *clear aged platelets*. J Exp Med, 2020. **217**(4).
- 603 53. Christo, S.N., et al., *Discrete tissue microenvironments instruct diversity in resident*  
604 *memory T cell function and plasticity*. Nat Immunol, 2021. **22**(9): p. 1140-1151.  
605



606 **Figures and Legends**

607

**Figure 1**

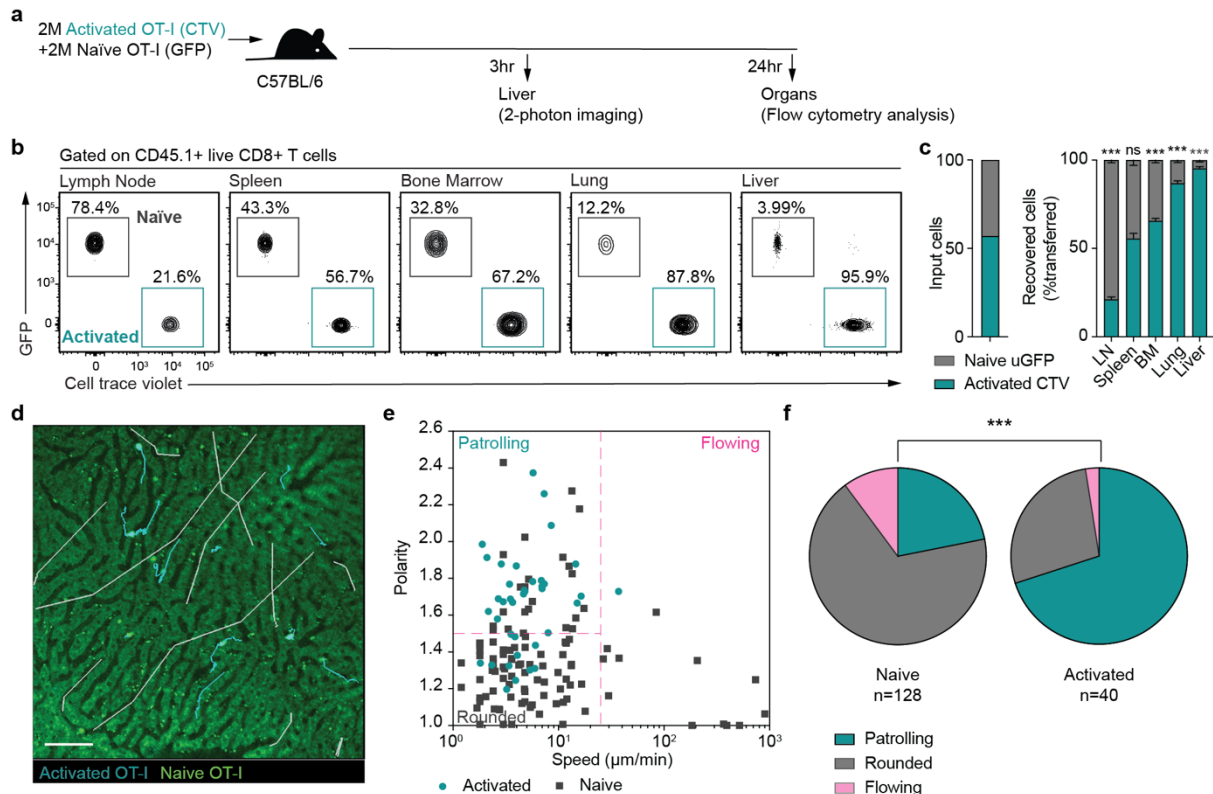

608

609

610 **Figure 1 *In vitro* activated CD8 T-lymphocytes demonstrate enhanced migration to**  
 611 **organs such as the liver and develop an effector phenotype with patrolling behaviour.**  
 612 (A)  $2 \times 10^6$  SIINFEKL pulsed OT-I T-cells (CTV) and  $2 \times 10^6$  naïve GFP<sup>+</sup> OT-I cells were  
 613 transferred to C57BL/6 mice. 4 hours post adoptive transfer, flow cytometry analysis was  
 614 conducted on axillary lymph nodes, spleen, bone marrow, lung and liver from recipients. (B-  
 615 C) Proportion of donor cells isolated from each organ after co-transfer of equal amounts of  
 616 activated (blue) and naïve (green) OT-I cells; data in B-C from 5 mice per group in one of  
 617 two independent experiments analyzed via one-sample t test; bars are mean  $\pm$  S.D; \*\*\*  
 618  $p < 0.001$  (D) Livers of recipient mice upon 2-photon microscopy using resonance scanning to  
 619 collect time-lapse movement at 3 frames per second demonstrating elongated linear tracks of  
 620 naïve cells (white) compared to short repetitive tracks of activated patrolling cells (blue). (E)  
 621 Mean speed versus polarity of activated (blue) and naïve (black) T-lymphocytes in the liver.  
 622 (F) Proportion of both naïve and *in vitro* activated cells exhibiting different T-cell migration  
 623 behaviours in recipient mice post transfer. Scale bar is 50µm. Data in D-F is pooled from 2  
 624 independent experiments analyzed by  $\chi^2$  test.

**Figure 2**

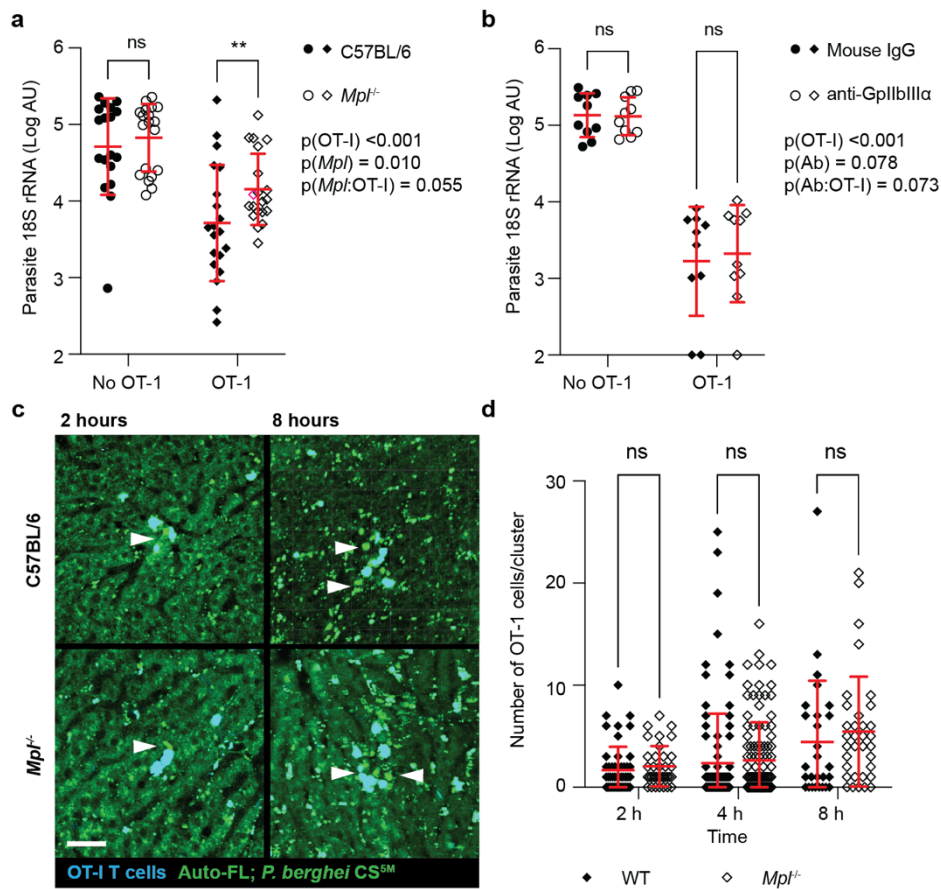

625

626

627 **Figure 2 OT-I effector lymphocyte killing capacity of *Plasmodium* is minimally affected**  
 628 **by platelets *in vivo*.** WT and *Mpl*<sup>-/-</sup> recipients (A) and platelet-depleted recipients (B)  
 629 received 5x10<sup>6</sup> *in vivo* activated OT-I cells. 24 hours later, recipients were infected with  
 630 5x10<sup>3</sup> *Plasmodium* sporozoites. *Plasmodium* 18S rRNA levels were measured 24 hours post  
 631 infection to assess protective function of adoptively transferred OT-I cells; data in A is  
 632 pooled from 4 similar experiments and data in B is pooled from 2 similar experiments with 4-  
 633 5 mice per group analysed via LMM; bars are mean ± S.D.; \*\* p<0.01. (C) WT and *Mpl*<sup>-/-</sup>  
 634 recipient mice received 5x10<sup>6</sup> OT-I cells (blue) and were infected with GFP expressing *P.*  
 635 *berghei* CS<sup>5M</sup> (green- white arrow); scale bar 50 μm. (D) Using intravital imaging, the  
 636 number of cells surrounding each parasite within the liver was assessed at 2, 4 and 8 hours  
 637 post infection in WT and *Mpl*<sup>-/-</sup> recipients; data from at least 3 mice per group per timepoint;  
 638 bars are mean ± S.D.; analysed via LMM.  
 639

### Figure 3

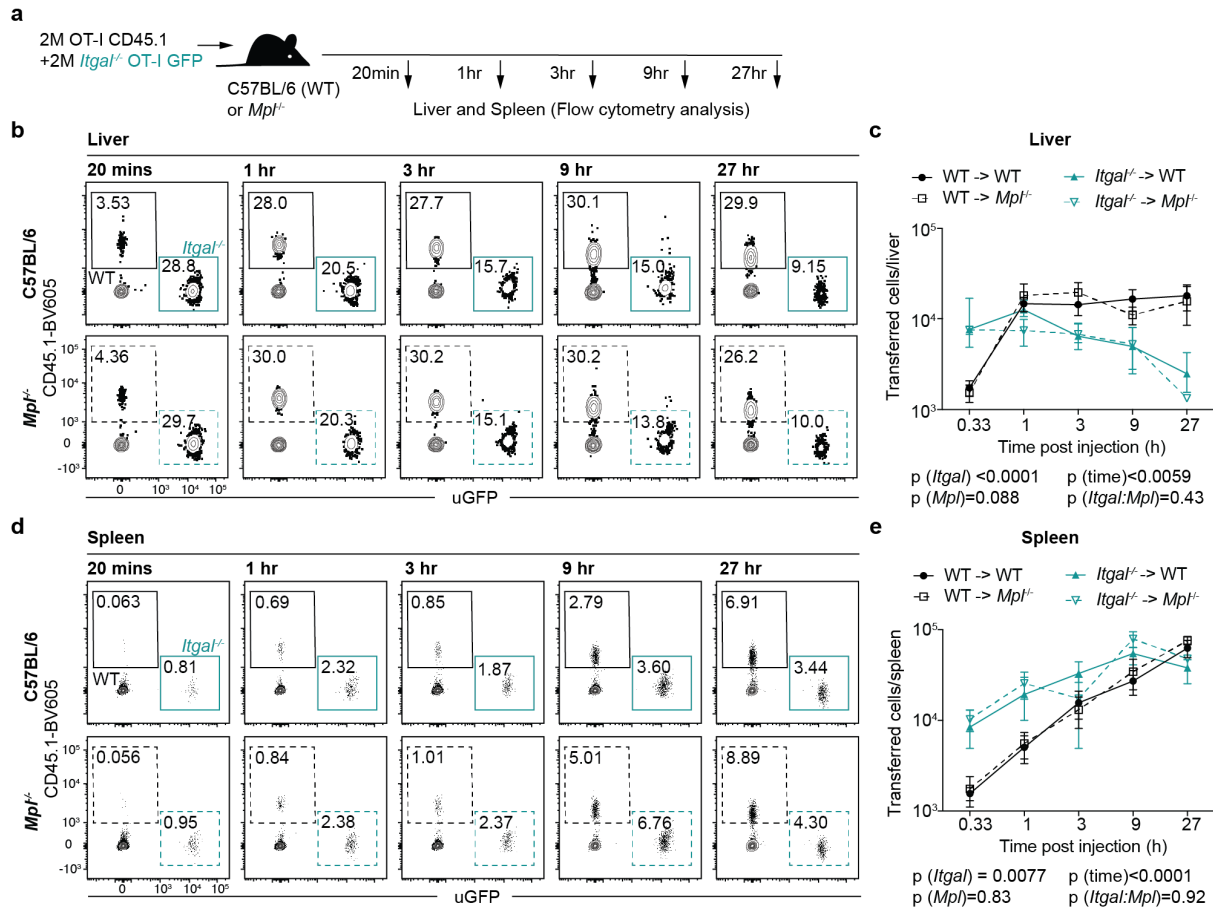

640

641

642 **Figure 3 LFA-1 binding acts as a dominant homing mechanism of OT-1 cells from the**  
 643 **circulation to the spleen and liver.** (A)  $2 \times 10^6$  OT-I cells, and  $2 \times 10^6$  OT-I GFP<sup>+</sup> *Itgal*<sup>-/-</sup> cells  
 644 were co-transferred to C57BL/6 or *Mpl*<sup>-/-</sup> recipients. Single cell suspensions from the liver  
 645 and spleen were prepared at several timepoints post transfer (20m, 1hr, 3hr, 9hr and 27hr) and  
 646 flow cytometry was used to assess *Itgal*<sup>-/-</sup> (blue) and WT (black) donor cell accumulation in  
 647 the liver (B-C) and spleen (D-E) of C57BL/6 (solid line) and *Mpl*<sup>-/-</sup> (dashed line) recipients.  
 648 Results are pooled from two independent experiments with 5 mice per group; bars are mean ±  
 649 S.D; analyzed via LMM.

650



## Figure 4

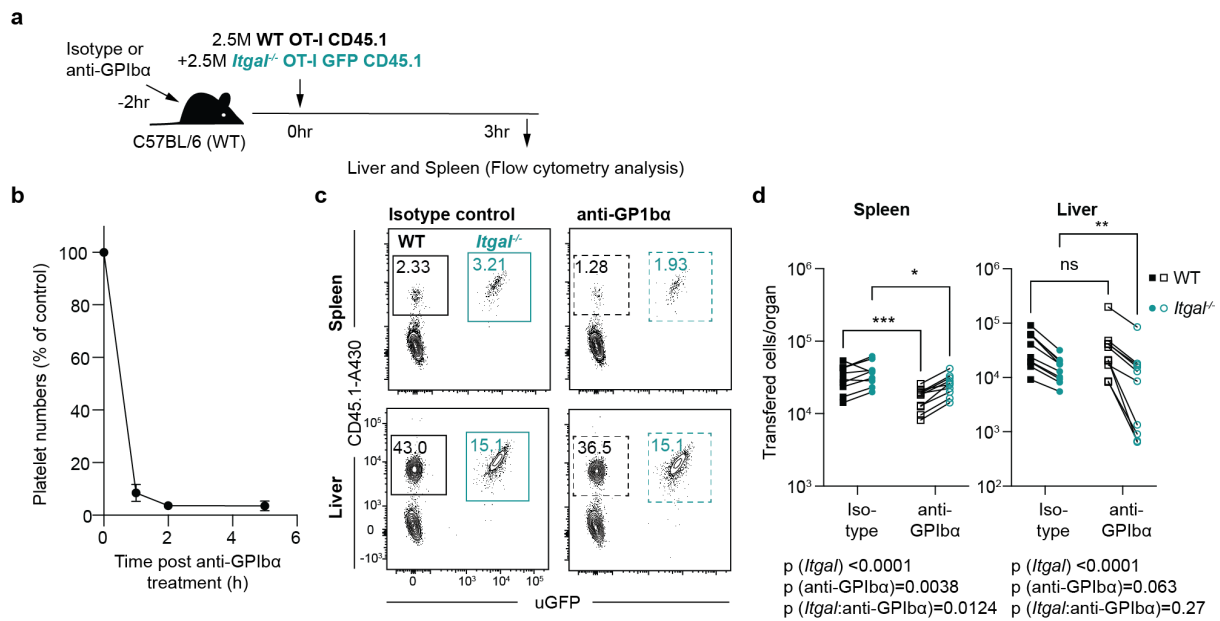

651  
652  
653

654 **Figure 4 Platelet depletion decreases lymphocyte homing to the spleen however has**  
655 **marginal effect on homing to the liver in the absence of LFA-1.** (A)  $2.5 \times 10^6$  OT-I cells,  
656 and  $2.5 \times 10^6$  OT-I GFP<sup>+</sup> *Itgal*<sup>-/-</sup> cells were co-transferred to C57BL/6 recipients which had  
657 received platelet depletion antibody treatment (anti-GPIIb/α) or isotype control. Single cell  
658 suspensions from the liver and spleen of the recipients were prepared at 3 hours post adoptive  
659 transfer for analysis. (B) Kinetics of platelet depletion following treatment anti-GPIIb/α. (C)  
660 Representative flow cytometry plots and summary data (D) of the numbers of *Itgal*<sup>-/-</sup> (blue)  
661 and WT (black) donor cell cells in the spleen and liver C57BL/6 (solid line) and anti-GPIIb/α  
662 (dashed line) recipients. Results are pooled from two independent experiments (n=5 per  
663 experiment) analyzed via LMM, \* p<0.05, \*\* p<0.01.

## Figure 5

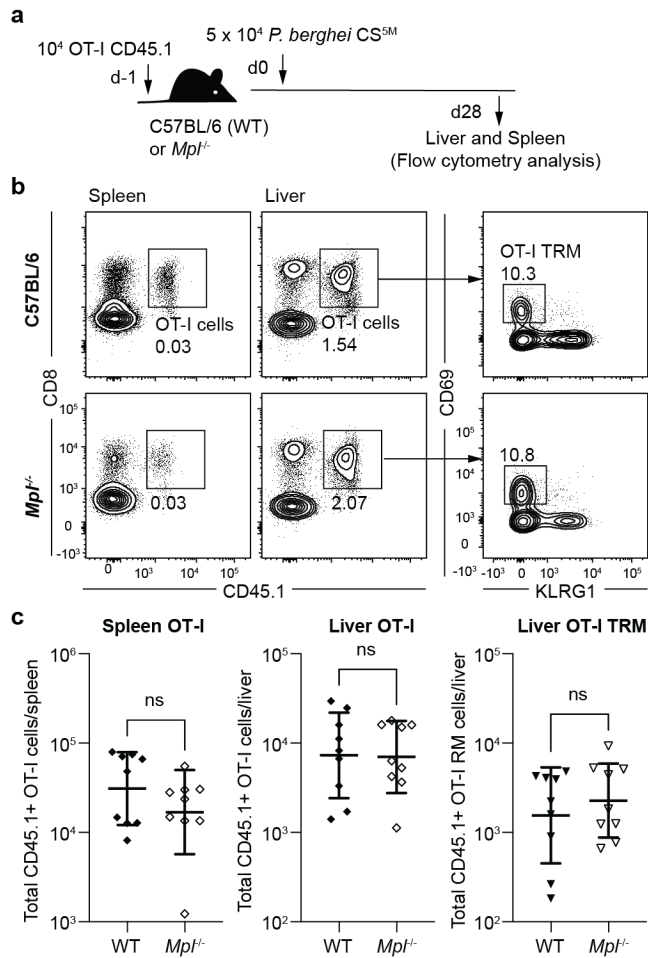

664  
665

666 **Figure 5 *In vivo* generation of tissue resident memory T cells is not affected by the**  
667 **absence of platelets in the spleen and liver.** (A) C57BL/6 and *Mpl*<sup>-/-</sup> recipients received  
668 1x10<sup>4</sup> OT-I cells prior to immunisation with 5x10<sup>4</sup> *P.berghei* CS<sup>5M</sup> RAS 24h later to generate  
669 CD8 tissue resident memory (TRM) populations *in vivo* after 28 days. Total transferred cells  
670 recovered from the spleen and liver were assessed at day 28 post immunisation from both  
671 C57BL/6 and *Mpl*<sup>-/-</sup> recipients. (B) Representative flow cytometry plots and (C) summary  
672 data pooled from 2 independent experiments each with 5 mice per group; bars are mean ±  
673 S.D; analyzed via LMM.  
674

**Figure 6**

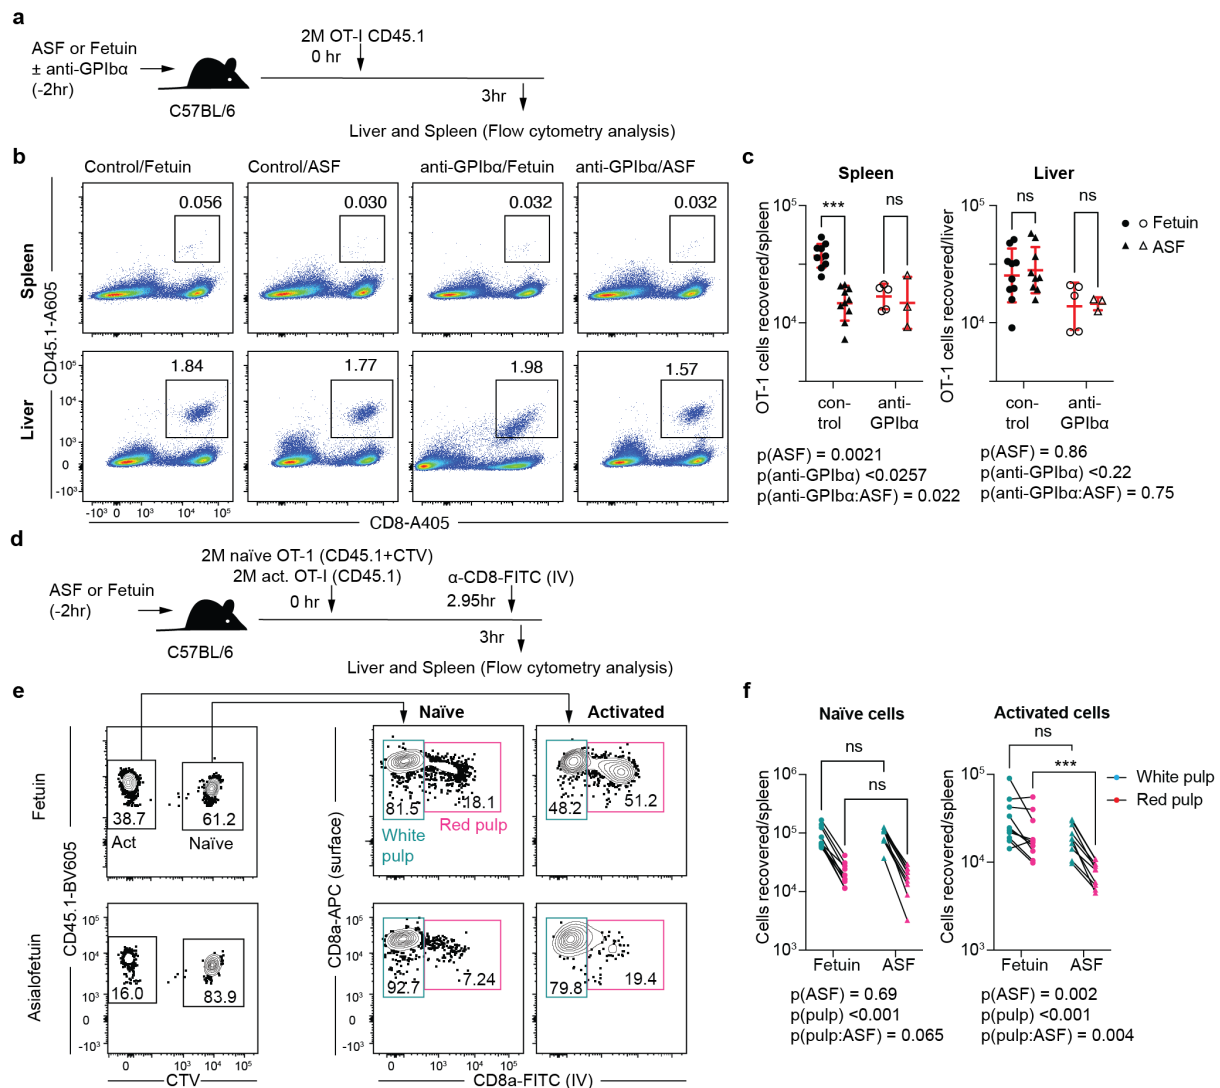

675

676

677 **Figure 6 Asialylated glycoprotein residues reduce effector lymphocyte homing to the**  
 678 **heavily vascularised red pulp of the spleen, with no effect on homing to the liver. (A)**  
 679 Prior to adoptive transfer of  $2 \times 10^6$  OT-I cells, recipient C57BL/6 mice were treated with  
 680 glycoproteins (ASF or the control Fetuin) and either platelet depletion antibody therapy (anti-  
 681 GPIIbα), or an isotype control. (B) Single cell suspensions from the liver and spleen of the  
 682 recipients were prepared at 3 hours post adoptive transfer and flow cytometry was used to  
 683 quantify WT (black) donor cell accumulation in the spleen and liver. (C) Total recovered OT-  
 684 I cells from the spleen and liver after antiplatelet therapy (anti-GPIIbα /isotype) and  
 685 glycoprotein blocking treatment (ASF/Fetuin); data are pooled from 2 experiments, one with  
 686 just non-platelet depleted animals and one with all four groups; bars are mean ± S.D;  
 687 analyzed via LMM; \*\*\* P<0.001. (D) Prior to co-transfer of  $2 \times 10^6$  *in vivo* activated OT-I  
 688 cells and  $2 \times 10^6$  naïve OT-I cells, recipient C57BL/6 mice were treated with glycoprotein  
 689 blocking treatment (ASF or the control Fetuin). Immediately prior to culling at 3 hours post  
 690 transfer, recipients received FITC conjugated anti-CD8 antibody i.v to label CD8+ T-cells  
 691 flowing in the systemic circulation. (E-F) Single cell suspensions from the spleen were  
 692 obtained and quantified using flow cytometry. Activated and naïve transgenic CD45.1 cells

693 were isolated and identified as being resident in the red pulp (pink) or white pulp (green)  
694 based on FITC labelling *in vivo*. Results are pooled from two independent experiments  
695 analyzed via LMM; \*\*\* $p < 0.001$ . Asterisks (\*) indicate significant differences between  
696 groups (\*  $p < 0.05$ ). ns, not significant.  
697

**Figure 7**

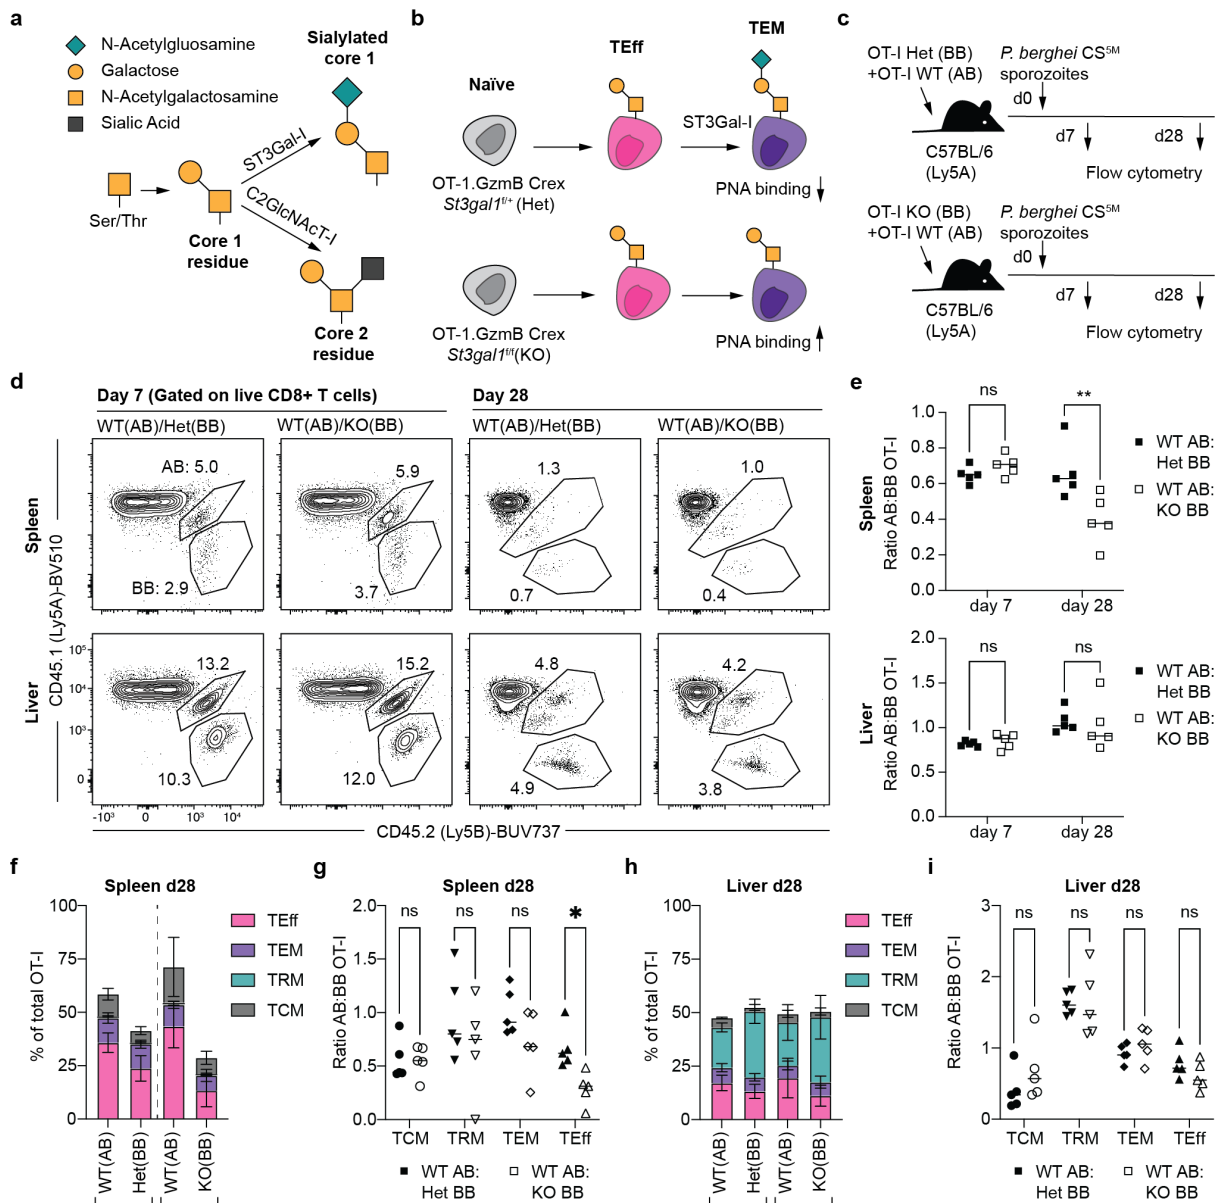

698

699

700 **Figure 7 Forced expression of ASGPs reduces accumulation of effector CD8+ T cells in**  
 701 **the spleen.** (A) Graphical representation of the normal glycoprotein pathway of glycosylation  
 702 modifications from a single Threonine/Serine residue to a Core-1 residue. Enzymatic  
 703 modification via ST3GalI adds a sialic acid residue to the terminal core 1 residue, whereas  
 704 C2GlcNAcT-I adds a N-acetylglucosamine residue resulting in a core-2 residue with each  
 705 residue having its own distinct, functional properties. (B) Rationale behind the generation and  
 706 desired conditional knockout model of CD8+ effector cell loss of *ST3Gal* enzyme ultimately  
 707 resulting in effector cells with desialylated residues on core-1 molecules, resulting in greater  
 708 PNA binding. (C) WT mice received equal ratios of both activated WT OT-I CD8+  
 709 lymphocytes (Ly5AB) and either *St3Gal* heterozygous conditional knockouts (GzmB Crex  
 710 *St3Gal<sup>+/-</sup>*), or homozygous mutant conditional knockouts (GzmB Crex *St3Gal<sup>-/-</sup>*). All mice  
 711 were then immunised as per previous experiments using  $5 \times 10^3$  RAS and transferred cells  
 712 quantified at both day 7 and day 28 post immunisation from the spleen and liver. (D) Flow  
 713 cytometry analysis of WT OT-I cells (AB) and both homozygous and heterozygous *St3Gal*

714 KO cells (BB) in the spleen and liver at day 7, and day 28 post immunisation. (E) Ratio of  
715 WT (AB) to GzmB Cre x *St3Gall* (BB) transgenic cells at day 7 and day 28 post  
716 immunisation in the spleen and liver. TEff, TEM, TRM and TCM cell phenotypes as a  
717 percentage of total OT-I cells and their WT to transgenic ratios recovered in the spleen (F-G)  
718 and liver (H-I) at day 28 post immunisation. Data are from a single experiment with 5 mice  
719 per group analyzed via 2-way ANOVA with Tukey post-test; bars are mean  $\pm$  S.D; analyzed  
720 via LMM; \*  $p < 0.05$ , \*\* $p < 0.01$ .  
721

722 **Supplementary Movie Captions**

723

724 **Movie S1: Migration of naïve and activated CD8<sup>+</sup> T cells in the liver**  $2 \times 10^6$  SIINFEKL  
725 pulsed OT-I T-cells (CTV) and  $2 \times 10^6$  naïve GFP<sup>+</sup> OT-I cells were transferred to C57BL/6  
726 mice. 4 hours post transfer, livers of recipient mice were imaged using 2-photon microscopy  
727 with resonance scanning to collect time-lapse movement at 3 frames per second  
728 demonstrating elongated linear tracks of naïve cells (white) compared to short repetitive  
729 tracks of activated patrolling cells (blue). Scale bar = 50 $\mu$ m. Autofluorescence of liver stroma  
730 (green).

731

732

733 **Movie S2: Migration of CD8<sup>+</sup> T cells in livers from wild-type and platelet-deficient mice**  
734  $2 \times 10^6$  SIINFEKL pulsed uGFP<sup>+</sup> OT-I T-cells (green) were adoptively transferred to  
735 C57BL/6 and *Mpl*<sup>-/-</sup> recipients. 4 hours post transfer, livers of recipient mice were prepared  
736 and imaged using 2-photon microscopy. For each series, a 50 $\mu$ m Z-stack (2 $\mu$ m/slice) was  
737 acquired using the galvo-scanner at a frame rate of ~2 frames per minute demonstrating a  
738 liver sinusoidal crawling phenotype. Scale bar = 50 $\mu$ m. Autofluorescence of liver stroma  
739 (green).

740
